# Supplementary material for: Effect of the size of polycyclic aryl groups on the competition between adiabatic/diabatic photoisomerization mechanisms of cis-styrylarenes
Source: Royal Society of Chemistry journal article supplement (doi:10.1039/c9pp00009g), 2019-03-29
Supplement: c9pp00009g1.pdf [file c9pp00009g1.pdf]

## SUPPORTING INFORMATION

### Effect of the size of polycyclic aryl groups on the competition between adiabatic/diabatic photoisomerization mechanisms of *cis*-styrylarenes

A. Cesaretti, B. Carlotti,\* F. Elisei and A. Spalletti

*Department of Chemistry, Biology and Biotechnology and Centro di Eccellenza sui Materiali Innovativi Nanostrutturati (CEMIN), University of Perugia, via Elce di Sotto 8, 06123 Perugia, Italy.*

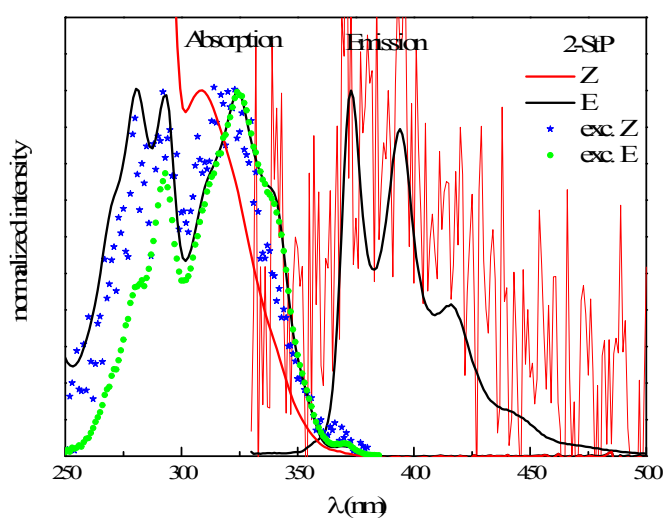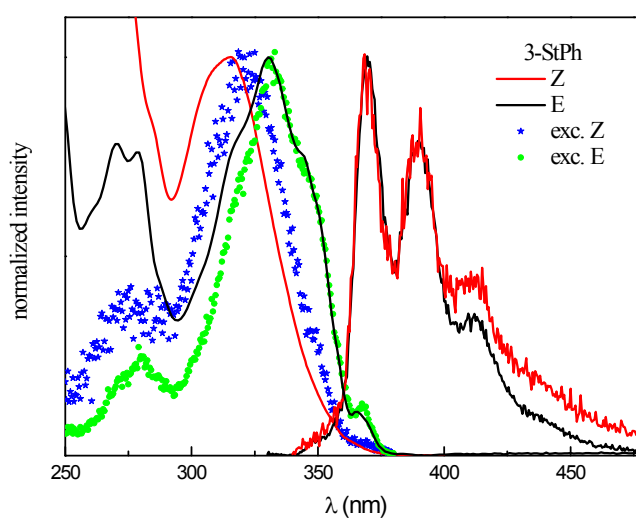

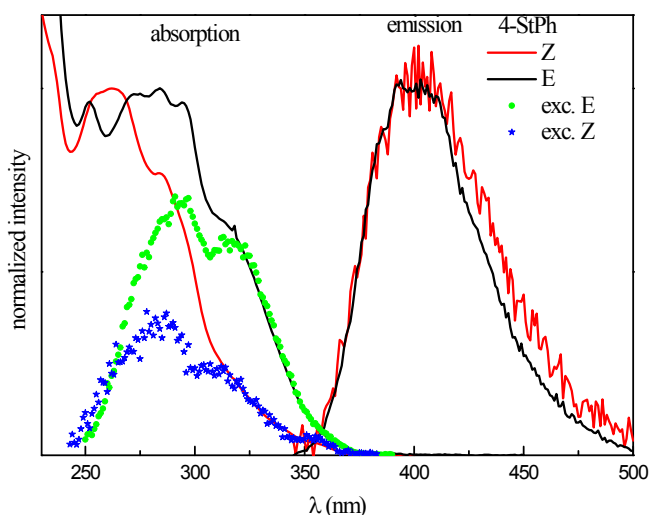

Figure 1S. Normalized absorption, fluorescence excitation and emission spectra obtained by exciting Z and E isomers of *n*-StP (with *n* = 2, 3 and 4) in MCH/3MP at room temperature.

Table 1S. Calculated total energy (E) (ab-initio basis set 3-21G) and electronic spectra (transition energy,  $\lambda$  and oscillator strength,  $f$ , ZINDO/S) for the two rotamers of Z isomers of the investigated compounds.<sup>a</sup>The data in parentheses refers to the calculations performed with a larger basis set (6-31G\*, present work).

| compound | rotamer | R(C-C') ( $\text{\AA}$ ) | E (kcal/mol)               | % (293K)   | $\lambda$ (nm) | $f$ (20x20) |                |
|----------|---------|--------------------------|----------------------------|------------|----------------|-------------|----------------|
| Stilbene |         | 3.30                     | -335177.53                 |            | 279            | 0.079       | S <sub>1</sub> |
|          |         |                          |                            |            | 270            | 0.44        | S <sub>3</sub> |
| 1-StN    | s-cis   | 3.42                     | -430430.34<br>(-432845.59) | 83<br>(91) | 312            | 0.025       | S <sub>1</sub> |
|          |         |                          |                            |            | 291            | 0.39        | S <sub>2</sub> |
|          | s-trans | 3.77                     | -430429.41<br>(-432844.25) | 17<br>(9)  | 232            | 0.66        | S <sub>6</sub> |
|          |         |                          |                            |            | 310            | 0.014       | S <sub>1</sub> |
| 2-StN    | s-cis   | 3.31                     | -430431.25<br>(-432846.84) | 42<br>(43) | 280            | 0.32        | S <sub>2</sub> |
|          |         |                          |                            |            | 223            | 1.02        | S <sub>8</sub> |
|          |         |                          |                            |            | 317            | 0.008       | S <sub>1</sub> |
|          | s-trans | 3.26                     | -430431.44<br>(-432847.00) | 58<br>(57) | 292            | 0.31        | S <sub>2</sub> |
|          |         |                          |                            |            | 260            | 0.59        | S <sub>4</sub> |
|          |         |                          |                            |            | 317            | 0.005       | S <sub>1</sub> |
| 1-StP    | s-cis   | 3.41                     | -525685.94                 | 86         | 283            | 0.63        | S <sub>2</sub> |
|          |         |                          |                            |            | 262            | 0.41        | S <sub>4</sub> |
|          |         |                          |                            |            | 329            | 0.011       | S <sub>1</sub> |
|          | s-trans | 3.81                     | -525684.88                 | 14         | 294            | 0.54        | S <sub>2</sub> |
|          |         |                          |                            |            | 250            | 1.32        | S <sub>6</sub> |
|          |         |                          |                            |            | 328            | 0.008       | S <sub>1</sub> |
| 2-StP    | s-cis   | 3.31                     | -525687.25                 | 48         | 288            | 0.32        | S <sub>2</sub> |
|          |         |                          |                            |            | 248            | 0.68        | S <sub>6</sub> |
|          |         |                          |                            |            | 332            | 0.002       | S <sub>1</sub> |
|          | s-trans | 3.28                     | -525687.30                 | 52         | 291            | 0.35        | S <sub>2</sub> |
|          |         |                          |                            |            | 276            | 0.57        | S <sub>3</sub> |
|          |         |                          |                            |            | 333            | 0.002       | S <sub>1</sub> |
| 3-StP    | s-cis   | 3.31                     | -525687.38                 | 56         | 290            | 0.41        | S <sub>2</sub> |
|          |         |                          |                            |            | 276            | 0.56        | S <sub>3</sub> |
|          |         |                          |                            |            | 331            | 0.005       | S <sub>1</sub> |

|         |         |      |            |     |     |       |                |
|---------|---------|------|------------|-----|-----|-------|----------------|
|         |         |      |            |     | 301 | 0.46  | S <sub>2</sub> |
|         |         |      |            |     | 243 | 0.95  | S <sub>7</sub> |
|         | s-trans | 3.30 | -525687.25 | 44  | 331 | 0.007 | S <sub>1</sub> |
|         |         |      |            |     | 298 | 0.76  | S <sub>2</sub> |
|         |         |      |            |     | 247 | 1.11  | S <sub>6</sub> |
| 4-StP   | s-cis   | 3.39 | -525681.56 | 100 | 333 | 0.01  | S <sub>1</sub> |
|         |         |      |            |     | 293 | 0.23  | S <sub>2</sub> |
|         |         |      |            |     | 279 | 0.42  | S <sub>3</sub> |
|         |         |      |            |     | 254 | 0.80  | S <sub>6</sub> |
|         | s-trans |      | -525567.19 | 0   | 315 | 0.03  | S <sub>1</sub> |
|         |         |      |            |     | 271 | 0.08  | S <sub>2</sub> |
|         |         |      |            |     | 267 | 0.41  | S <sub>3</sub> |
| 9-StPh  | s-cis   | 3.46 | -525686.13 | 85  | 329 | 0.009 | S <sub>1</sub> |
|         |         |      |            |     | 298 | 0.34  | S <sub>2</sub> |
|         |         |      |            |     | 249 | 1.09  | S <sub>6</sub> |
|         | s-trans | 3.80 | -525685.13 | 15  | 327 | 0.008 | S <sub>1</sub> |
|         |         |      |            |     | 288 | 0.31  | S <sub>2</sub> |
|         |         |      |            |     | 247 | 1.34  | S <sub>7</sub> |
|         |         |      |            |     | 264 | 0.83  | S <sub>3</sub> |
| 3-StCr  | s-cis   | 3.35 | -620940.88 | 66  | 343 | 0.003 | S <sub>1</sub> |
|         |         |      |            |     | 313 | 0.44  | S <sub>2</sub> |
|         |         |      |            |     | 276 | 0.78  | S <sub>4</sub> |
|         | s-trans | 3.31 | -620940.50 | 34  | 344 | 0.002 | S <sub>1</sub> |
|         |         |      |            |     | 311 | 0.75  | S <sub>2</sub> |
|         |         |      |            |     | 276 | 1.18  | S <sub>4</sub> |
| 3-StBPh | s-cis   | 3.30 | -620933.69 | 35  | 353 | 0.01  | S <sub>1</sub> |
|         |         |      |            |     | 314 | 0.29  | S <sub>2</sub> |
|         |         |      |            |     | 286 | 1.35  | S <sub>4</sub> |
|         | s-trans | 3.26 | -620934.06 | 65  | 353 | 0.004 | S <sub>1</sub> |
|         |         |      |            |     | 312 | 0.35  | S <sub>2</sub> |
|         |         |      |            |     | 288 | 1.02  | S <sub>4</sub> |

<sup>a</sup> from ref. 48.

Table 2S. Experimental parameters for the fluorescence decay obtained by exciting Z-2StN in MCH/3MP at different temperatures ( $\lambda_{exc} = 316$  nm).

| T (K) | $\tau_1$ (ns) | % 1 | $\tau_2$ (ns) | % 2 | $\chi^2$ |
|-------|---------------|-----|---------------|-----|----------|
| 293   | 0.17          | 6   | 21.5          | 94  | 1.04     |
| 253   | 0.34          | 22  | 22.3          | 78  | 1.06     |
| 203   | 0.40          | 64  | 19.8          | 36  | 1.07     |
| 153   | 0.59          | 94  | 17.1          | 6   | 1.07     |
| 133   | 1.4           | 89  | 4.6           | 11  | 1.13     |
| 123   | 1.7           | 47  | 3.5           | 53  | 1.06     |
| 77    | 2.8           | 68  | 5.3           | 32  | 1.08     |
